1

Title

2

**Is there a genetic correlation between movement and**

3

**immobility in field populations of a beetle?**

4

5

Kentarou Matsumura<sup>1</sup>

6

Takahisa Miyatake<sup>2</sup>

7

8

1. Graduate School of Agriculture, Kagawa University, Kagawa, Japan

9

2. Graduate School of Environmental and Life Science, Okayama University,

10

Okayama, Japan

11

12

Corresponding author:

13

Kentarou Matsumura

14

E-mail: [ag20110@s.okayama-u.ac.jp](mailto:ag20110@s.okayama-u.ac.jp)

15

Tell: +81-80-1796-8803

16

17

**Abstract**

18 Genetic correlations among behavioural traits are often controlled by pleiotropic genes.  
19 Many studies suggest the existence of genetic correlations among behavioural traits  
20 based on artificial selection experiments in the laboratory. However, few studies have  
21 examined whether behavioural correlations in the laboratory are maintained in the field,  
22 where natural selection works. Artificial selection experiments showed a behavioural  
23 correlation among death feigning, walking movement, and locomotor activity in the red  
24 flour beetle (*Tribolium castaneum*). This study investigated whether this behavioural  
25 correlation is observed in wild *T. castaneum* populations. We also collected beetles from  
26 various regions in Japan and investigated the geographic variation in these traits. There  
27 was geographic variation in the three behavioural traits. However, these behavioural  
28 traits were not correlated. The results suggest that the genetic correlations among  
29 behavioural traits are not maintained in the field. Therefore, the results derived from  
30 laboratory experiments may be overestimated. The same correlation between traits was  
31 not believed to arise in the field, as the indoor results may have been caused by  
32 unrealistic selection pressures. Further laboratory and field investigations are both  
33 needed.

34

35 **Keyword:** behavioural correlation, genetic correlation, death feigning, moving,

36 locomotor activity, geographic variation

37

## 38 **Introduction**

39 Animal behaviours are often correlated with other behavioural traits due to  
40 environmental and genetic factors (Lande, 1979; Lande & Arnold, 1983; Bell, 2005).

41 Correlations among behavioural traits by genetic factors (*i.e.*, genetic correlation) are  
42 often controlled by pleiotropic genes (Lande, 1979; Lande & Arnold, 1983; Bell, 2005).

43 If a correlation among behavioural traits has a genetic basis when natural selection  
44 favors a behaviour, other behavioural traits genetically correlated with the behavioural  
45 trait may also evolve, even if the correlated behaviours decrease fitness. This may  
46 decrease the variation in behavioural traits. That is, a genetic correlation among  
47 behavioural traits may maintain the variation in behavioural traits within a population.

48 Therefore, studies of genetic correlations among behavioural traits are important in  
49 behavioural ecology.

50 Artificial selection is an experimental method that examines genetic correlations  
51 among behavioural traits (Hill & Caballero, 1992; Garland Jr & Carter, 1994). When  
52 behavioural traits respond to artificial selection for another behavioural trait, the  
53 relationship among these behavioural traits may be genetic (Falconer & Mackay, 1996).

54 Many artificial selection experiments have examined animal behaviours. For example,  
55 risk-taking behaviour in the great tit, *Parus major* was correlated with artificial  
56 selection for exploration behaviour (van Oers, Drent, de Goede, & van Noordwijk,  
57 2004). In the adzuki bean beetle, *Callosobruchus chinensis*, when the duration of  
58 death-feigning behaviour, which may be adaptive anti-predator behaviour, is selected  
59 artificially, flight activity responds negatively as a correlated trait (Ohno & Miyatake,  
60 2007). However, because the pressure due to artificial selection may not occur in the  
61 field, these studies may have overestimated the correlations among behavioural traits.  
62 Therefore, comparative investigations using wild populations, not only artificial  
63 selection, are important to explain the evolution of correlations among behavioural  
64 traits.

65 Wild populations may be under many selection pressures compared with  
66 populations selected artificially (Mousseau, Sinervo, & Endler, 2000). If the genetic  
67 correlation among behavioural traits is controlled by pleiotropic genes, this behavioural  
68 correlation may be observed in wild populations. However, few studies have  
69 investigated behavioural correlations using both artificial selection and wild populations  
70 (but see Ohno & Miyatake, 2007).

71           The intensity and direction of selection pressure may differ among  
72           geographically different populations. Geographic variation in morphological and  
73           life-history traits has been observed in many species (*e.g.*, Bergmann, 1848;  
74           Blanckenhorn & Demont, 2004; Blanckenhorn, Stillwell, Young, Fox, & Ashton, 2006).  
75           Furthermore, many studies have reported geographic variation in behavioural traits  
76           (*e.g.*, Lankinen, 1986; Foster & Endler, 1999; Mathias, Jacky, Bradshaw, & Holzapfel,  
77           2005; Lankinen & Forsman, 2006). Therefore, if the relationship among behavioural  
78           traits is genetic, geographic variation may also be observed in the behavioural  
79           correlation. However, few studies have investigated behavioural correlations in various  
80           wild populations.

81           In this study, we examined the red flour beetle *Tribolium castaneum*, a common  
82           cereal storage pest worldwide (Sokoloff, 1977). Previous studies induced artificial  
83           selection on two behavioural traits in *T. castaneum*: death-feigning behaviour and  
84           moving ability (Miyatake, Katayama, Takeda, Nakashima, Sugita, & Mizumoto, 2004;  
85           Matsumura & Miyatake, 2015). Miyatake, Katayama, Takeda, Nakashima, Sugita, &  
86           Mizumoto (2004) artificially selected death-feigning duration and established genetic  
87           strains with longer (LD) and shorter (SD) durations of death-feigning; in a predation  
88           experiment, LD individuals had a higher survival rate than the SD strain in encounters

89 with the jumping spider, *Hasarius adansoni*. Moreover, individuals from the LD strain  
90 were significantly less mobile than the SD strain (Miyatake, Tabuchi, Sasaki, Okada,  
91 Katayama, & Moriya, 2008b). Matsumura and Miyatake (2015) artificially selected  
92 moving ability and established higher (HM) and lower (LM) mobility strains.  
93 Individuals from the HM strain had significantly shorter death feigning and greater  
94 locomotor activity than the LM strain (Matsumura, Sasaki, & Miyatake, 2016). These  
95 studies suggested that the relationship among death feigning, moving ability, and  
96 locomotor activity is genetic in *T. castaneum*. The relationship among these behavioural  
97 traits was also demonstrated in *Tribolium confusum* (Nakayama, Nishi, & Miyatake,  
98 2010; Nakayama, Sasaki, Matsumura, Lewis, & Miyatake, 2012) and *C. chinensis*  
99 (Ohno & Miyatake, 2007; Nakayama & Miyatake, 2010) in artificial selection  
100 experiments. If these three behavioural traits are correlated genetically, such  
101 correlations may be observed in wild insect populations and geographic variation might  
102 be found in nature. Therefore, in this study, we measured the death feigning, moving  
103 ability, and locomotor activity of *T. castaneum* in wild populations at 36 locations in  
104 Japan. To investigate the role of genetic factors in the behavioural correlations, we used  
105 wild populations maintained for at least two generations after collection from the field.  
106 We investigated whether the behavioural correlation was observed in wild populations.

107

## 108 **Materials & Methods**

### 109 *Insect*

110 *Tribolium castaneum* was collected at 36 locations in Japan (Fig. 1). Table S1 shows the  
111 latitude and longitude of each. The northernmost is Aomori (40°89'N, 140°46'E) and  
112 the southernmost is Okinawa (26°25'N, 127°69'E) (Appendix Table A1). Collection  
113 was done in 2016 and 2017. Each beetle was reared in an incubator (Sanyo, Tokyo,  
114 Japan) maintained 25°C and 16L:8D light cycle (light on at 07:00, off at 23:00). Food is  
115 a mixture of whole meal (Nisshin Seifun, Tokyo, Japan) with brewer's yeast (Asahi  
116 Beer, Tokyo).

117

### 118 *Measurements of each behavioural trait*

119 We measured frequency and duration of death feigning of *T. castaneum*, in  
120 accordance with Miyatake, Katayama, Takeda, Nakashima, Sugita, & Mizumoto (2004).  
121 Virgin males and females (21–28 days old) were randomly collected from each wild  
122 population. When the beetle shows death-feigning behaviour by touching the beetle's  
123 abdomen with a stick, we measured the duration with a stopwatch (the duration was  
124 defined as the time until detecting its first visible movement). If the beetle did not show

125 death feigning, the stimuli was repeated up to three times. Details of the methods for  
126 observation of death feigning are described in Miyatake, Katayama, Takeda,  
127 Nakashima, Sugita, & Mizumoto (2004).

128 Walking distance as the moving ability of *T. castaneum* was measured using an image  
129 tracker system (Digimo, Osaka, Japan), in accordance with Matsumura and Miyatake  
130 (2015). Virgin beetles (21–28 days old) were collected from each population and  
131 measured walking distance. The moving behaviour were recorded for 30 min, and  
132 measure the walking distance of each beetle on the recorded image, we used analysis  
133 software (2D-PTV Ver. 9.0, Digimo, Osaka, Japan). Details of the methods for  
134 measurement of moving ability are described in Matsumura and Miyatake (2015).

135 To measurement of locomotor activity, virgin males and females (21–28 days old)  
136 were randomly collected from each wild population, and measured locomotor activity  
137 used by an infrared actograph system. When the beetle passed the midpoint of the dish,  
138 the infrared light between emitter and detector device (E3R-5E4/R2E4DS30E4; Omron,  
139 Kyoto, Japan) was interrupted. We measured the number of interruptions of the infrared  
140 light for 24 h as locomotor activity of the beetle. To remove artificial effect on behavior,  
141 we removed first 2 h data (i.e., we used 22 h data for statistical analysis). Details of the  
142 methods for measurement of locomotor activity are described in Matsumura, Sasaki, &



143 Miyatake (2016).

144

145 *Statistical analysis*

146 Death-feigning duration (+ 1 s) and moving ability (+ 1 mm) were analyzed using a  
147 generalized linear model (GLM) with gamma distribution, and population, sex, and the  
148 interaction between population and sex as experimental variables. The frequencies of  
149 death feigning and locomotor activity were analyzed by GLMs with binomial and  
150 Poisson distributions, respectively. To analyze the relationship between duration of  
151 death feigning and moving ability within individual level, we used GLM with gamma  
152 distribution, and duration of death feigning as a dependent variable, and moving ability  
153 and population as experimental variables. Because individuals used measurement of  
154 locomotor activity are differed with individuals used measurement of death feigning and  
155 moving ability, we did not analysis of relationship between death feigning and  
156 locomotor activity, and moving and locomotor activity within individual. To analyze the  
157 relationship between death feigning, moving ability, and locomotor activity inter  
158 populations, we used Spearman's rank correlation coefficient for mean values of three  
159 behavioural traits in each wild population. To analyze the effects of latitude and  
160 longitude on mean values of each behavioural trait, we used analysis of covariance

161 (ANCOVA) with population, sex, and the interaction between the two as covariates. All  
162 analyses were done using R ver. 3.4.3 (R Core Team, 2017).

163

#### 164 *Ethical Note*

165 The laboratory population of *T. castaneum* used in this study have maintained at  
166 Okayama University for over 15 years. This population has been maintained on whole  
167 meal flour with yeast (see Miyatake et al. 2004). We reared this population at 25 °C,  
168 which resemble natural conditions for this insect. All animals in the study were handled  
169 more carefully. The use of these animals conforms to the Animal Ethics Policy of  
170 Okayama University.

171

#### 172 **Results**

173 Figure 2 shows the duration and frequency of death-feigning behaviour. Figure 3 shows  
174 the moving ability and locomotor activity. Table 1 shows the mean values of each  
175 behaviour. Death-feigning duration differed significantly among wild populations, but  
176 not the sexes (Fig. 2a, Table 2). The frequency of death feigning also differed  
177 significantly among wild populations, and was significantly more frequent in males  
178 (Fig. 2b, Table 2). Moving ability differed significantly among wild populations, but not

179 the sexes (Fig. 3a, Table 2). Locomotor activity differed significantly among wild  
180 populations, and females were significantly more active than males (Fig. 3b, Table 2).  
181 The interaction between wild population and sex was not significant in any behavioural  
182 trait (Table 2). Appendix Figure A1 shows the relationship between latitude and each  
183 behavioural trait. There were no significant associations between latitude and each  
184 behavioural trait (Table 3). Appendix Figure A2 shows the relationship between  
185 longitude and each behavioural trait. There were no significant associations between  
186 longitude and each behavioural trait (Table 3). Duration of death feigning did not show  
187 significantly correlated with moving ability within individual level ( $\chi^2_{1,1044} = 3.80, p =$   
188  $0.05112$ ). In inter population level, no behaviour was significantly correlated with  
189 another (Table 4).

190

## 191 **Discussion**

192 This study found geographic variation in death-feigning, moving ability, and locomotor  
193 activity among 36 wild populations collected in Japan (Figs. 2, 3). Because we used  
194 each population maintained at the laboratory for at least two generations, these  
195 behavioural differences among populations may be caused by genetic factors, rather  
196 than environmental or maternal factors. Moreover, the geographic variation suggests

197 that the selection pressures on the three behaviours differ among wild populations.  
198 However, although previous studies suggested genetic correlations among the three  
199 behaviours in artificial selection experiments, we did not find any correlations among  
200 the three behaviours in the wild populations (Fig. 4). This suggests that the intensity of  
201 the relationships among these behavioural traits is lower in the field, even if the genetic  
202 correlations were shown by artificial selection.

203         First, we discuss the results for the death-feigning behaviour. Prohammer and  
204 Wade (1981) reported geographic variation in death-feigning behaviour among  
205 populations from Spain, Japan, and USA. Our results are in accord regarding  
206 geographic variation in the duration of death feigning (Prohammer & Wade, 1981). We  
207 also found that geographic variation in death feigning was seen over a relatively narrow  
208 range compared with Prohammer & Wade (1981).

209         We considered three hypotheses to explain the death-feigning behaviour results.  
210 The first is the difference in predation pressure on each wild population. Death feigning  
211 is an adaptive anti-predator behaviour (Humphreys & Ruxton, 2018). However, the  
212 optimum death-feigning duration may be affected by predator type or density. In the  
213 great tit *Parus major*, the egg ejection rate showed geographic variation, and this pattern  
214 matched the geographic pattern of parasitism risk (Liang et al., 2016). In *T. castaneum*,

215 individuals with longer death-feigning duration increase their survival rate in encounters  
216 with predators (Miyatake, Katayama, Takeda, Nakashima, Sugita, & Mizumoto, 2004).  
217 Similarly, the optimum death-feigning duration may be altered by the density of  
218 predators. For example, individuals with longer death-feigning duration may increase  
219 the survival rate in places under higher predation pressure, whereas individuals with a  
220 shorter duration of this behaviour may increase foraging or reproductive success at  
221 places with lower predation pressure (Nakayama & Miyatake, 2010a, b). Moreover,  
222 differences in the type of predation may affect the evolution of this behaviour (Honma,  
223 Oku, & Nishida, 2006). For example, individuals with longer death-feigning duration  
224 may increase their survival rate when encountering active-hunting predators, whereas  
225 they may decrease the survival rate when encountering sit-and-wait predators (Honma,  
226 Oku, & Nishida, 2006). Therefore, in locations with sit-and-wait predators, shorter  
227 death-feigning duration may evolve. Populations with longer death-feigning duration  
228 might suffer predation pressure by active hunting predators, whereas populations with  
229 shorter death feigning might suffer predation pressure by sit-and-wait predators. Ohno  
230 & Miyatake (2007) also reported geographic variation in the duration of death feigning  
231 in *C. chinensis*, and suggested that this geographic variation was a result of differences

232 in predation pressure among these wild populations. Future studies should investigate  
233 the density and type of predators.

234 The second hypothesis is the effects of prey density. In *T. castaneum*, the  
235 optimal death-feigning duration may depend on the conspecific density. Miyatake,  
236 Nakayama, Nishi, & Nakajima (2009) reported that beetles with longer death-feigning  
237 duration had a higher survival rate in the presence of non-feigners or prey of a different  
238 species, compared to when alone, confirming the selfish-prey hypothesis. The prey  
239 density might have important effects on death-feigning behaviour. Conspecific or  
240 heterospecific density in populations with longer death-feigning durations may be  
241 higher, whereas it may be lower in populations with shorter death-feigning durations.  
242 Studies need to investigate the effects of population density.

243 The third hypothesis is founder effects on the behaviour. The founder effect, *i.e.*,  
244 the loss of genetic variation when a new population is established by a small number of  
245 individuals (Templeton, 1980), is found in animal behaviour (Suarez, Tsutui, Holway,  
246 & Case, 1999). In populations with longer death-feigning duration, populations may  
247 have been established by individuals with longer death-feigning durations. This  
248 hypothesis is based on the supposition that gene flow is infrequent among *T. castaneum*  
249 populations. Although a study reported a bottleneck in a wild population (Semeao,

250 Campbell, Beeman, Lorenzen, Whitworth, & Sloderbeck, 2012), another suggested that  
251 gene flow often occurs over a wide range in *T. castaneum* (Ridley, Hereward, Daglish,  
252 Raghu, Collins, & Walter, 2011). Additional studies should investigate genetic  
253 differences among wild populations.

254         Moving ability and locomotor activity also showed geographic variation among  
255 wild populations in *T. castaneum*. A previous study revealed that *T. castaneum* with  
256 genetically higher moving ability had a lower survival rate when predators were present  
257 (Matsumura & Miyatake, 2015). Similarly, individuals with higher locomotor activity  
258 are considered at increased risk of predation in many animals (Sih, Bell, & Johnson,  
259 2004; Réale, Reader, Sol, McDougall, & Dingemanse, 2007). Therefore, predation  
260 pressure on moving ability and locomotor activity may also differ among wild  
261 populations, as with death-feigning behaviour. Moreover, moving ability affects  
262 reproductive success, and there was a trade-off between survival rate and reproductive  
263 success between strains selected for higher and lower moving ability in *T. castaneum*  
264 (Matsumura & Miyatake, 2015, 2018a; Matsumura, Archer, Hosken, & Miyatake,  
265 2019). Therefore, these behavioural traits may be affected by balancing selection  
266 between predation avoidance and reproduction among wild populations. Moving ability  
267 seems to be similar to locomotor activity and vice versa. Nevertheless, these behaviours

268 were not significantly correlated. These results suggest that these behaviours evolved  
269 independently in the field. In the parasitoid wasp *Leptopilina heterotoma*, geographic  
270 variation was found in locomotor activity (Fleury, Allemand, Fouillet, & Boulétreau,  
271 1995). Furthermore, some insect studies reported that the circadian rhythm of locomotor  
272 activity showed geographic variation, with a clear rhythm at lower latitudes and no  
273 rhythmic activity at higher latitudes (*e.g.*, Fleury, Allemand, Fouillet, & Boulétreau,  
274 1995; Joshi, 1999). Additional studies should investigate the circadian rhythm of *T.*  
275 *castaneum* in each wild population.

276         Although this study revealed geographic variation in three behavioural traits,  
277 these behavioural traits did not show latitudinal or longitudinal clines (Appendix Figs.  
278 A1, A2). In the medaka *Oryzias latipes* complex, courtship behaviour by males and  
279 female preference for males showed latitudinal variation such that populations from  
280 lower latitudes showed greater intensity of these behaviours (Fujimoto, Miyake, &  
281 Yamahira, 2015). These results suggest that because the reproductive season is  
282 relatively shorter at lower latitudes, a latitudinal cline develops in the operational sex  
283 ratio among wild populations, which ultimately results in a latitudinal cline in sexual  
284 selection pressures (Fujimoto, Miyake, & Yamahira, 2015). Therefore, the intensity or  
285 direction of selection pressure on the behavioural traits may differ among wild



286 populations from various latitudes. Moreover, some studies reported that individuals  
287 had a significantly longer death-feigning duration under lower temperatures than under  
288 higher temperatures in other insect species (Holmes, 1906; Miyatake, Okada, & Harano,  
289 2008a). However, we did not find a latitudinal or longitudinal cline in death-feigning  
290 behaviour. That is, the effects of temperature on death feigning may be relatively  
291 smaller in *T. castaneum*, at least, within the temperature range examined in this study.  
292 Furthermore, moving ability and locomotor activity did not show latitudinal or  
293 longitudinal clines, which also suggested that environmental factors, such as  
294 temperature, do not affect these behavioural traits in this beetle.

295         Although the three behavioural traits showed geographic variation among the  
296 wild populations, we did not find a significant correlation among these behaviours (Fig.  
297 4). Some artificial selection studies in laboratories suggested a genetic correlation  
298 among death-feigning, moving ability, and locomotor activity in some insects (Ohno &  
299 Miyatake, 2007; Miyatake, Tabuchi, Sasaki, Okada, Katayama, & Moriya, 2008b;  
300 Nakayama & Miyatake, 2010; Nakayama, Nishi, & Miyatake, 2010; Nakayama, Sasaki,  
301 Matsumura, Lewis, & Miyatake, 2012; Matsumura, Fuchikawa, & Miyatake, 2017).  
302 Therefore, we hypothesized that there would be a correlation among these behavioural  
303 traits in wild populations. However, we did not find a significant correlation among

304 these behaviours. The results suggest that the intensity of the genetic correlations among  
305 each behaviour may be relatively lower in *T. castaneum*. Previous studies reported that  
306 moving ability and locomotor activity showed correlated responses to artificial selection  
307 for death-feigning behaviour for over 10 generations (Ohno & Miyatake, 2007;  
308 Miyatake, Tabuchi, Sasaki, Okada, Katayama, & Moriya, 2008b; Nakayama, Nishi, &  
309 Miyatake, 2010). Moreover, death-feigning and locomotor activity showed correlated  
310 responses to artificial selection for moving ability for more than 15 generations  
311 (Matsumura, Fuchikawa, & Miyatake, 2016). If the intensity of the genetic correlations  
312 among these behaviours is relatively low, these correlations may be difficult to observe  
313 in the field. Alternatively, the artificial selection pressure may be of abnormal intensity  
314 compared with the field. For example, although beetles from strains selected artificially  
315 for longer death-feigning duration feigned death for up to 1,000 seconds (Miyatake,  
316 Katayama, Takeda, Nakashima, Sugita, Mizumoto, & Miyatake, 2004; Matsumura &  
317 Miyatake, 2018b), few beetles feigned death this long in the wild populations (Fig. 2a).  
318 Another study reported that the duration of death feigning was correlated with flight  
319 activity within and among wild populations in *C. chinensis* (Ohno & Miyatake, 2007).  
320 Therefore, the intensity of the relationship between behaviours may differ among  
321 behaviours or species. Similar investigations of other behaviours or species are required.

322 In conclusion, a genetic correlation seen in artificial selection experiments in the  
323 laboratory among behavioural traits may not always be observed in the field. This is  
324 because the selection pressure due to artificial selection may be abnormal. This suggests  
325 that artificial selection may lead to overestimation of the results. Therefore, to study the  
326 evolution of genetic correlations in behavioural traits, behavioural ecologists should  
327 examine the relationships among behavioural traits using both artificial selection and  
328 wild populations.

329

### 330 **Acknowledgement**

331 We thanks to Mr. Yusuke Tsushima and Kohei Nakao for collection of *T. castaneum* in  
332 Aomori and Hyogo prefectures. This work was supported by a grant from the Japan  
333 Society for the Promotion of Science KAKENHI 26291091, 16K14810, 17H05976 and  
334 18H02510 to TM.

335

### 336 **Reference list**

337 1. Bell, A. M. (2005). Behavioral differences between individuals and two populations  
338 of stickleback (*Gasterosteus aculeatus*). *Journal of Evolutionary Biology*, 18,  
339 464-473. doi:10.1111/j.1420-9101.2004.00817.x

- 340 2. Bergmann, C. (1848). Uber die Verhaltnisse der Warmeokonomie der Thiere zu  
341 ihrer Grosse. Gottinger Stud, 1, 595–708.
- 342 3. Blanckenhorn, W. U., Stillwell, R. C., Young, K. A., Fox, C. W., & Ashton, K. G.  
343 (2006). When rensch meets bergmann: Does sexual size dimorphism change  
344 systematically with latitude? *Evolution*, 60, 2004–2011.  
345 doi:10.1111/j.0014-3820.2006.tb01838.x
- 346 4. Blanckenhorn, W. U., & Demont, M. (2004). Bergmann and converse Bergmann  
347 latitudinal clines in arthropods: Two ends of a continuum? *Integrative and*  
348 *Comparative Biology*, 44, 413–424. doi:10.1093/icb/44.6.413
- 349 5. Semeao, A.A., Campbell, J. F., Beeman, R. W., Lorenzen, M. D., Whitworth, R. J.,  
350 & Sloderbeck, P. E. (2012). Genetic structure of *Tribolium castaneum* (Coleoptera:  
351 Tenebrionidae) populations in mills. *Environmental Entomology*, 41, 188–199.  
352 doi:10.1603/EN11207
- 353 6. Falconer, D. S., & Mackay, T. F. C. (1996). *Introduction to quantitative genetics*.  
354 4thed. Harlow, Essex: Longman.
- 355 7. Fleury, F., Allemand, R., Fouillet, P., & Boulétreau, M. (1995). Genetic variation in  
356 locomotor activity rhythm among populations of *Leptopilina heterotoma*  
357 (Hymenoptera: Eucoilidae), a larval parasitoid of *Drosophila* species. *Behavior*

- 358           Genetics, 25, 81-89. doi:10.1007/BF02197245
- 359   8. Foster, S. A., & Endler, J. A. (1999). Geographic variation in behavior. Oxford  
360   University Press.
- 361   9. Fujimoto, S., Miyake, T., & Yamahira, K. (2015). Latitudinal variation in male  
362   competitiveness and female choosiness in a fish: are sexual selection pressures  
363   stronger at lower latitudes? *Evolutionary Biology*, 42, 75-87.  
364   doi:10.1007/s11692-014-9300-9
- 365   10. Garland, Jr. T., & Carter, P. A. (1994). Evolutionary physiology. *Annual Review of*  
366   *Physiology*, 56, 579-621. doi:10.1146/annurev.ph.56.030194.003051
- 367   11. Hill, W. G., & Caballero, A. (1992). Artificial selection experiments. *Annual*  
368   *Review of Ecology, Evolution, and Systematics*, 23, 287-310.  
369   doi:10.1146/annurev.es.23.110192.001443
- 370   12. Holmes, J. S. (1906). Death-feigning in *Ranatra*. *Journal of Comparative*  
371   *Neurology and Psychology*, 16, 200-216. doi:10.1002/cne.920160305
- 372   13. Honma, A., Oku, S., & Nishida, T. (2006). Adaptive significance of death feigning  
373   posture as a specialized inducible defence against gape-limited predators.  
374   *Proceedings of the Royal Society B*, 273, 1631-1636. doi:10.1098/rspb.2006.3501
- 375   14. Joshi, D. S. (1999). Latitudinal variation in locomotor activity rhythm in adult

- 376 *Drosophila ananassae*. Canadian Journal of Zoology, 77, 865-870.  
377 doi:10.1139/z99-051
- 378 15. Humphreys, R. K., & Ruxton, G. D. (2018). A review of thanatosis (death feigning)  
379 as an anti-predator behavior. Behavioral Ecology and Sociobiology, 72, 22.  
380 doi:10.1007/s00265-017-2436-8
- 381 16. Lande, R. (1979). Quantitative genetic analysis of multivariate evolution, applied to  
382 brain: body size allometry. Evolution, 33, 402-416.  
383 doi:10.1111/j.1558-5646.1979.tb04694.x
- 384 17. Lande, R., & Arnold, S. (1983). The measurement of selection on correlated  
385 characters. Evolution, 37, 1210-1226. doi:10.1111/j.1558-5646.1983.tb00236.x
- 386 18. Lankinen, P. (1986). Geographical variation in circadian eclosion rhythm and  
387 photoperiodic adult diapause in *Drosophila littoralis*. Journal of Comparative  
388 Physiology A, 159, 123-142. doi:10.1007/BF00612503
- 389 19. Lankinen, P. F., & Forsman, P. (2006). Independence of genetic geographical  
390 variation between photoperiodic diapause, circadian eclosion rhythm, and Thr-Gly  
391 repeat region of the period gene in *Drosophila littoralis*. Journal of Biological  
392 Rhythms, 21, 3-12. doi:10.1177/0748730405283418
- 393 20. Liang, W., Møller, A. P., Stokke, B. G., Yang, C., Kovařík, P., Wang, H., Yao, C. T.,

- 394 Ding, P., Lu, X., Moksnes, A., Røskaft, E., & Grim, T. (2016). Geographic variation  
395 in egg ejection rate by great tits across 2 continents. *Behavioral Ecology*, 27,  
396 1405–1412. doi:10.1093/beheco/arw061
- 397 21. Mathias, D., Jacky, L., Bradshaw, W. E., & Holzapfel, C. M. (2005). Geographic  
398 and developmental variation in expression of the circadian rhythm gene, *timeless*,  
399 in the pitcher-plant mosquito, *Wyeomyia smithii*. *Journal of Insect Physiology*, 51,  
400 661-667. doi:10.1016/j.jinsphys.2005.03.011
- 401 22. Matsumura, K., Fuchikawa, T., & Miyatake, T. (2017). Decoupling of behavioral  
402 trait correlation across life stages in two holometabolous insects. *Behavior Genetics*,  
403 47, 459-467. doi:10.1007/s10519-017-9847-1
- 404 23. Matsumura, K., & Miyatake, T. (2015). Differences in attack avoidance and mating  
405 success between strains artificially selected for dispersal distance in *Tribolium*  
406 *castaneum*. *PLoS ONE*, 10(5), e0127042. doi:10.1371/journal.pone.0127042
- 407 24. Matsumura, K., & Miyatake, T. (2018a). Costs of walking: differences in egg size  
408 and starvation resistance of females between strains of the red flour beetle  
409 (*Tribolium castaneum*) artificially selected for walking ability. *Journal of*  
410 *Evolutionary Biology*, 31, 1632-1637. doi:10.1111/jeb.13356
- 411 25. Matsumura, K., & Miyatake, T. (2018b). Responses to relaxed and reverse selection

- 412 in strains artificially selected for duration of death-feigning behavior in the red flour  
413 beetle, *Tribolium castaneum*. *Journal of Ethology*, 36, 161-168.  
414 doi:10.1007/s10164-018-0548-x
- 415 26. Matsumura, K., Sasaki, K., & Miyatake, T. (2016). Correlated responses in  
416 death-feigning behavior, activity, and brain biogenic amine expression in red flour  
417 beetle *Tribolium castaneum* strains selected for walking distance. *Journal of*  
418 *Ethology*, 34, 97-105. doi:10.1007/s10164-015-0452-6
- 419 27. Matsumura, K., Archer, C. R., Hosken, D. J., & Miyatake, T. (2019). Artificial  
420 selection on walking distance suggests a mobility-sperm competitiveness trade-off.  
421 *Behavioral Ecology*, 30, 1522-1529. doi:10.1093/beheco/arz110
- 422 28. Miyatake, T. (2001). Diurnal periodicity of death-feigning in *Cylas formicarius*  
423 (Coleoptera: Brentidae). *Journal of Insect Behavior*, 14, 421-432.  
424 doi:10.1023/A:1011196420147
- 425 29. Miyatake, T., Katayama, K., Takeda, Y., Nakashima, A., Sugita, A., & Mizumoto,  
426 M. (2004). Is death-feigning adaptive? Heritable variation in fitness difference of  
427 death-feigning behaviour. *Proceedings of the Royal Society B*, 271, 2293-2296.  
428 doi:10.1098/rspb.2004.2858
- 429 30. Miyatake, T., Nakayama, S., Nishi, Y., & Nakajima, S. (2009). Tonicall



- 430 immobilized selfish prey can survive by sacrificing others. *Proceedings of the*  
431 *Royal Society B*, 276, 2763-2767. doi:10.1098/rspb.2009.0558
- 432 31. Miyatake, T., Okada, K., & Harano, T. (2008a). Negative relationship between  
433 ambient temperature and death-feigning intensity in adult *Callosobruchus*  
434 *maculatus* and *Callosobruchus chinensis*. *Physiological Entomology*, 33, 83-88.  
435 doi:10.1111/j.1365-3032.2007.00607.x
- 436 32. Miyatake, T., Tabuchi, K., Sasaki, K., Okada, K., Katayama, K., & Moriya, S.  
437 (2008b). Pleiotropic antipredator strategies, fleeing and feigning death, correlated  
438 with dopamine levels in *Tribolium castaneum*. *Animal Behaviour*, 75, 113-121.  
439 doi:10.1016/j.anbehav.2007.04.019
- 440 33. Mousseau, T. A., Sinervo, B., & Endler, J. A. (2000). Adaptive genetic variation in  
441 the wild. Oxford University Press, USA.
- 442 34. Nakayama, S., & Miyatake, T. (2010a). A behavioral syndrome in the adzuki bean  
443 beetle: genetic correlation among death feigning, activity, and mating behavior.  
444 *Ethology*, 116, 108-112. doi:10.1111/j.1439-0310.2009.01721.x
- 445 35. Nakayama, S., & Miyatake, T. (2010b). Genetic trade-off between abilities to avoid  
446 attack and to mate: a cost of tonic immobility. *Biology Letters*, 6, 18-20.  
447 doi:10.1098/rsbl.2009.0494

- 448 36. Nakayama, S., Nishi, Y., & Miyatake, T. (2010). Genetic correlation between  
449 behavioral traits in relation to death-feigning behavior. *Population Ecology*, 52,  
450 329-335. doi:10.1007/s10144-009-0188-7
- 451 37. Nakayama, S., Sasaki, K., Matsumura, K., Lewis, Z., & Miyatake, T. (2012).  
452 Dopaminergic system as the mechanism underlying personality in a beetle. *Journal*  
453 *of Insect Physiology*, 58, 750-755. doi:10.1016/j.jinsphys.2012.02.011
- 454 38. Ohno, T., & Miyatake, T. (2007). Drop or fly? Negative genetic correlation between  
455 death-feigning intensity and flying ability as alternative anti-predator strategies.  
456 *Proceedings of the Royal Society B*, 274, 555-560. doi:10.1098/rspb.2006.3750
- 457 39. Prohammer, L. A., & Wade, M. J. (1981). Geographic and genetic variation in  
458 death-feigning behavior in the red flour beetle, *Tribolium castaneum*. *Behavior*  
459 *Genetics*, 11, 395-401. doi:10.1007/BF01070822
- 460 40. R Core Team. (2017). R: A language and environment for statistical computing.
- 461 41. Ridley, A. W., Hereward, J. P., Daghli, G. J., Raghu, S., Collins, P. J., & Walter, G.  
462 H. (2011). The spatiotemporal dynamics of *Tribolium castaneum* (Herbst): adult  
463 flight and gene flow. *Molecular Ecology*, 20, 1635-1646.  
464 doi:10.1111/j.1365-294X.2011.05049.x
- 465 42. Réale, D., Reader, S. M., Sol, D., McDougall, P. T., & Dingemanse, N. J. (2007).

- 466 Integrating animal temperament within ecology and evolution. *Biological Reviews*,  
467 82, 291-318. doi:10.1111/j.1469-185X.2007.00010.x
- 468 43. Sih, A., Bell, A. M., & Johnson, J. C. (2004). Behavioral syndromes: an ecological  
469 and evolutionary overview. *Trends in Ecology & Evolution*, 19, 372-378.  
470 doi:10.1016/j.tree.2004.04.009
- 471 44. Sokoloff, A. (1977). The biology of *Tribolium* with special emphasis on genetic  
472 aspects. Volume 3. Clarendon Press, Oxford.
- 473 45. Suarez, A. V. S., Tsutui, N. D., Holway, D. A., & Case, T. J. (1999). Behavioral and  
474 genetic differentiation between native and introduced populations of the argentine  
475 ant. *Biological Invasions*, 1, 43–53. doi:10.1023/A:1010038413690
- 476 46. Templeton, A. R. (1980). The theory of speciation via the founder principle.  
477 *Genetics*,  
478 94, 1011-1038.
- 479 48. van Oers, k., Drent, P. J., de Goede, P., & van Noordwijk, A. J. (2004). Realized  
480 heritability and repeatability of risk-taking behaviour in relation to avian  
481 personalities. *Proceedings of the Royal Society B*, 271, 65–73.  
482 doi:10.1098/rspb.2003.2518
- 483



485 **Figure and Table**

486

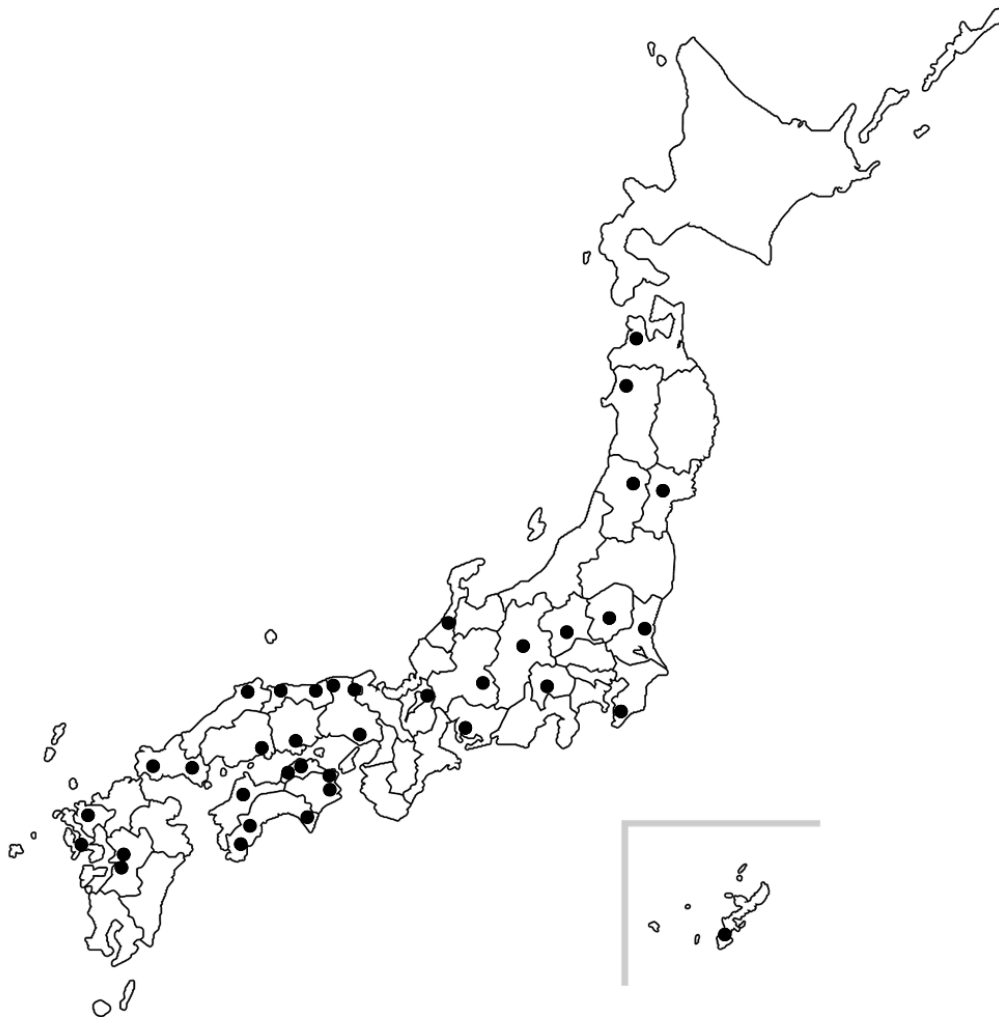

487

488 **Figure 1.** Places that captured of wild population of *T. castaneum* in Japan.

489

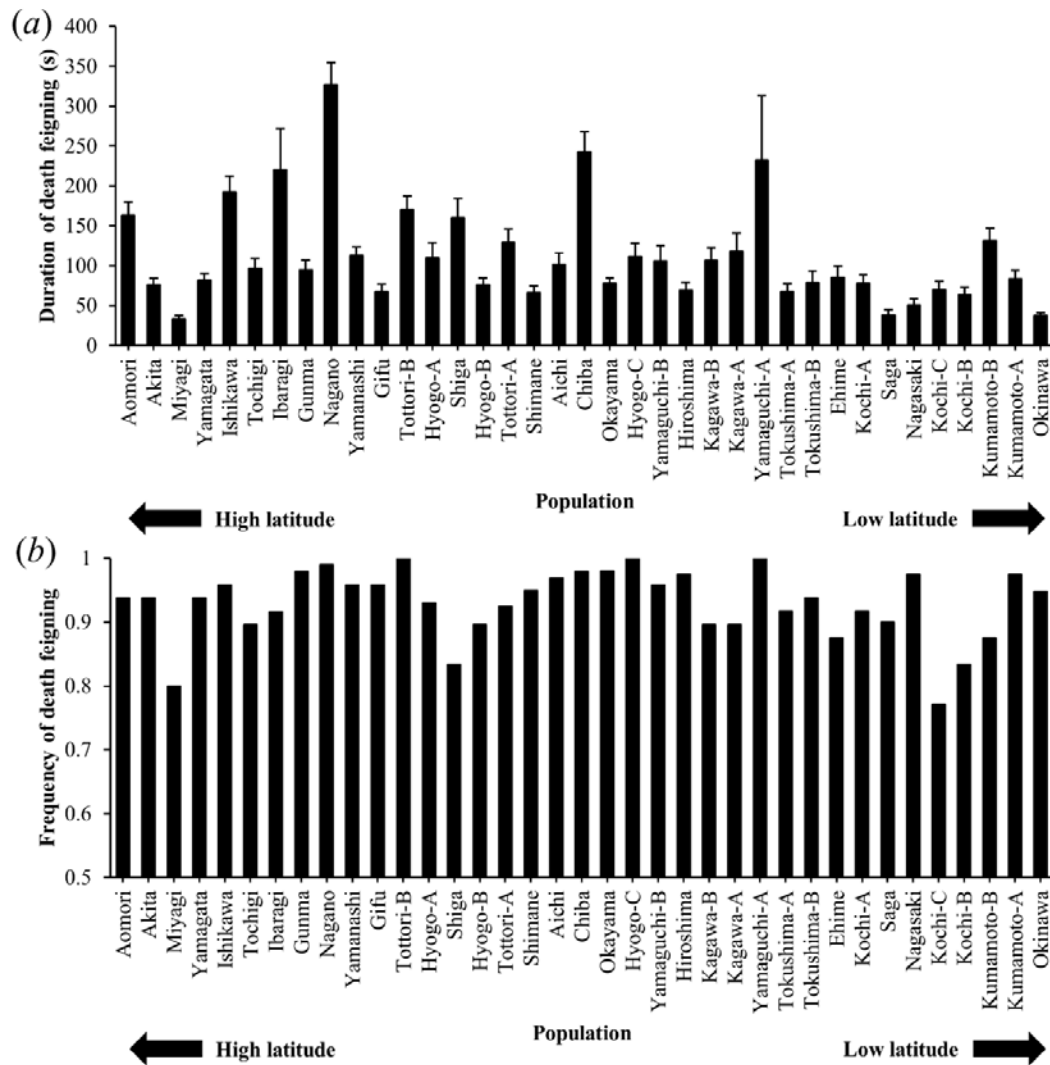

490

491 **Figure 2.** Duration (a) and frequency (b) of death-feigning behaviour in each population.

492 Error bars show SE.

493

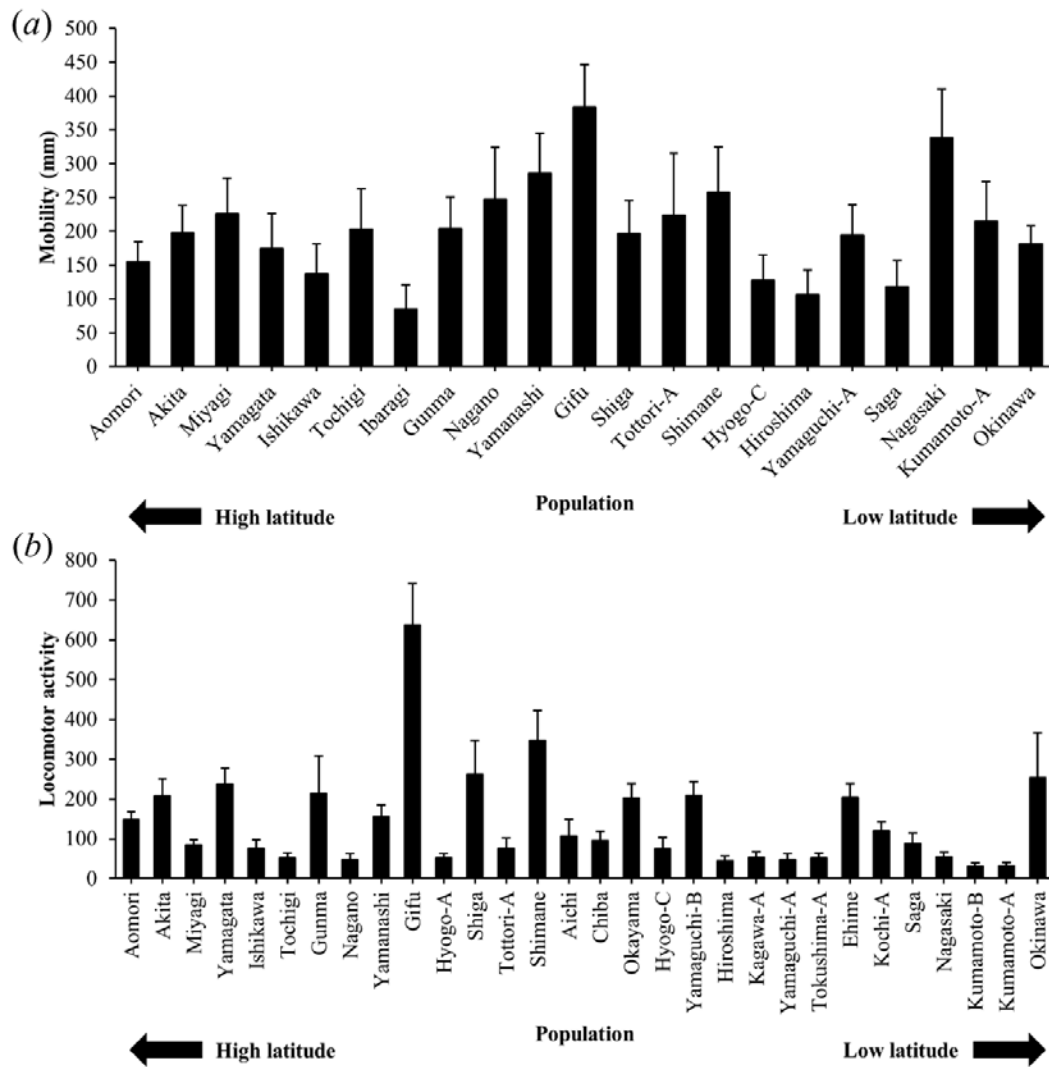

494

495 **Figure 3.** Mobility (a) and locomotor activity (b) in each population. Error bars show

496 SE.

497

498

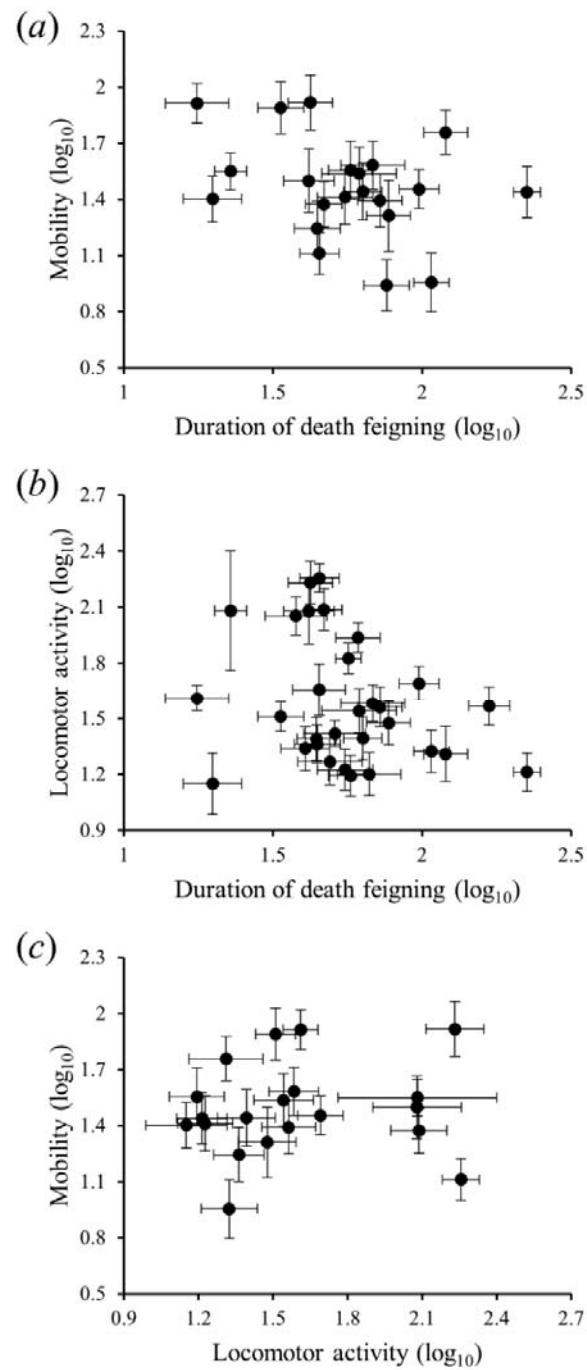

499

500 **Figure 4.** Relationship between duration of death feigning and walking speed or

501 locomotor activity. Each point shows mean value of each population. Error bars show

502 SE.





504 **Table 1.** Mean and SE of each trait.

| Trait                          | Male               |          | Female             |          |
|--------------------------------|--------------------|----------|--------------------|----------|
|                                | Mean $\pm$ SE      | <i>N</i> | Mean $\pm$ SE      | <i>N</i> |
| Duration of death feigning (s) | 116.35 $\pm$ 5.26  | 1064     | 120.81 $\pm$ 6.31  | 1022     |
| Frequency of death feigning    | 0.94 $\pm$ 0.01    | 1064     | 0.92 $\pm$ 0.01    | 1022     |
| Walking distance (mm)          | 214.11 $\pm$ 17.49 | 533      | 184.63 $\pm$ 14.52 | 533      |
| Locomotor activity             | 95.52 $\pm$ 7.09   | 614      | 216.62 $\pm$ 19.82 | 605      |

505

506

507 **Table 2.** Results of GLM for effects of population and sex on death feigning, walking  
508 distance, and locomotor activity.

| Trait                       | Factor         | <i>d.f.</i> | $\chi^2$ | <i>p</i> |
|-----------------------------|----------------|-------------|----------|----------|
| Duration of death feigning  | Population     | 36          | 564.08   | < 0.0001 |
|                             | Sex            | 1           | 0.38     | 0.5368   |
|                             | Population×sex | 35          | 41.88    | 0.2308   |
|                             | Error          | 2012        |          |          |
| Frequency of death feigning | Population     | 36          | 85.88    | < 0.0001 |
|                             | Sex            | 1           | 4.88     | 0.02713  |
|                             | Population×sex | 36          | 28.09    | 0.82391  |
|                             | Error          | 2012        |          |          |
| Walking distanc             | Population     | 20          | 31.92    | 0.04414  |
|                             | Sex            | 1           | 1.39     | 0.2379   |
|                             | Population×sex | 20          | 20.37    | 0.43457  |
|                             | Error          | 1025        |          |          |
| Locomotor activity          | Population     | 29          | 255.60   | < 0.0001 |
|                             | Sex            | 1           | 59.84    | < 0.0001 |
|                             | Population×sex | 27          | 30.53    | 0.2909   |

Error

1161

---

509

510

511 **Table 3.** Results of mixed ANOVA for effects of latitude, longitude and sex on each  
512 behavioural traits.

| Trait          | Factor    | <i>d.f.</i> | <i>F</i> | <i>P</i> |
|----------------|-----------|-------------|----------|----------|
| Death feigning | Latitude  | 1           | 0.05     | 0.8199   |
|                | Longitude | 1           | 1.87     | 0.1803   |
|                | Sex       | 1           | 0.26     | 0.6128   |
|                | Error     | 2082        |          |          |
| Mobility       | Latitude  | 1           | 0.01     | 0.9276   |
|                | Longitude | 1           | 0.00     | 0.9674   |
|                | Sex       | 1           | 1.74     | 0.1880   |
|                | Error     | 1062        |          |          |
| Activity       | Latitude  | 1           | 0.01     | 0.9143   |
|                | Longitude | 1           | 0.15     | 0.6993   |
|                | Sex       | 1           | 40.80    | < 0.0001 |
|                | Error     | 1217        |          |          |

513

514

515 **Table 4.** Results of Spearman's rank correlation coefficient for mean values in each  
516 behavioural trait.

| Factors                               | <i>N</i> | $\rho$ | <i>P</i> |
|---------------------------------------|----------|--------|----------|
| Duration of death feigning & mobility | 21       | -0.21  | 0.3630   |
| Duration of death feigning & activity | 30       | -0.27  | 0.1521   |
| Mobility & activity                   | 20       | 0.20   | 0.4015   |

517

518

519 **Appendix**

520

521 **Table A1.** Name, latitude, longitude, and sample size of each behavioural traits of each

522 place that captured of populations of *T. castaneum*.

| Population | Latitude | Longitude | Sample size    |               |                    |
|------------|----------|-----------|----------------|---------------|--------------------|
|            |          |           | Death feigning | Walking speed | Locomotor activity |
| Aomori     | 40.8909  | 140.4552  | 80             | 77            | 80                 |
| Akita      | 40.1825  | 140.0518  | 80             | 79            | 20                 |
| Miyagi     | 38.5726  | 140.8723  | 40             | 40            | 64                 |
| Yamagata   | 38.4264  | 140.3856  | 80             | 78            | 20                 |
| Ishikawa   | 36.6707  | 136.7276  | 96             | 48            | 42                 |
| Tochigi    | 36.5747  | 139.8776  | 48             | 48            | 42                 |
| Ibaragi    | 36.3746  | 140.4169  | 95             | 48            | -                  |
| Gunma      | 36.3546  | 139.1299  | 48             | 48            | 64                 |
| Nagano     | 35.9904  | 137.9795  | 96             | 47            | 44                 |
| Yamanashi  | 35.5952  | 138.5768  | 48             | 47            | 64                 |
| Gifu       | 35.5583  | 137.4489  | 48             | 48            | 64                 |
| Tottori-B  | 35.5357  | 134.3827  | 48             | -             | -                  |

|             |         |          |     |    |    |
|-------------|---------|----------|-----|----|----|
| Hyogo-A     | 35.4942 | 134.5642 | 43  | -  | 64 |
| Shiga       | 35.4862 | 136.2289 | 48  | 48 | 64 |
| Hyogo-B     | 35.4649 | 134.9447 | 48  | -  | -  |
| Tottori-A   | 35.4216 | 133.7830 | 40  | 40 | 24 |
| Shimane     | 35.2467 | 132.5565 | 40  | 38 | 22 |
| Aichi       | 35.0232 | 136.9688 | 96  | -  | 42 |
| Chiba       | 35.0029 | 139.9148 | 48  | -  | 43 |
| Okayama     | 34.7247 | 133.6436 | 100 | -  | 76 |
| Hyogo-C     | 34.6903 | 134.9988 | 40  | 40 | 24 |
| Yamaguchi-B | 34.5033 | 131.4720 | 48  | -  | 64 |
| Hiroshima   | 34.5006 | 133.3735 | 40  | 40 | 30 |
| Kagawa-B    | 34.3208 | 133.9018 | 48  | -  | -  |
| Kagawa-A    | 34.2553 | 133.7846 | 48  | -  | 32 |
| Yamaguchi-A | 34.2240 | 131.8132 | 40  | 40 | 20 |
| Tokushima-A | 34.0737 | 134.3950 | 48  | -  | 32 |
| Tokushima-B | 33.9734 | 134.6358 | 48  | -  | -  |
| Ehime       | 33.9224 | 133.0625 | 48  | -  | 32 |
| Kochi-A     | 33.4298 | 133.9903 | 48  | -  | 32 |



|            |         |          |    |    |    |
|------------|---------|----------|----|----|----|
| Saga       | 33.2845 | 130.0928 | 40 | 40 | 32 |
| Nagasaki   | 33.0817 | 129.8691 | 40 | 40 | 34 |
| Kochi-C    | 33.0401 | 133.0547 | 48 | -  | -  |
| Kochi-B    | 32.9847 | 132.9482 | 48 | -  | -  |
| Kumamoto-B | 32.8051 | 130.8083 | 48 | -  | 20 |
| Kumamoto-A | 32.7974 | 130.7815 | 40 | 39 | 24 |
| Okinawa    | 26.2459 | 127.6915 | 96 | 93 | 4  |

---

523

524

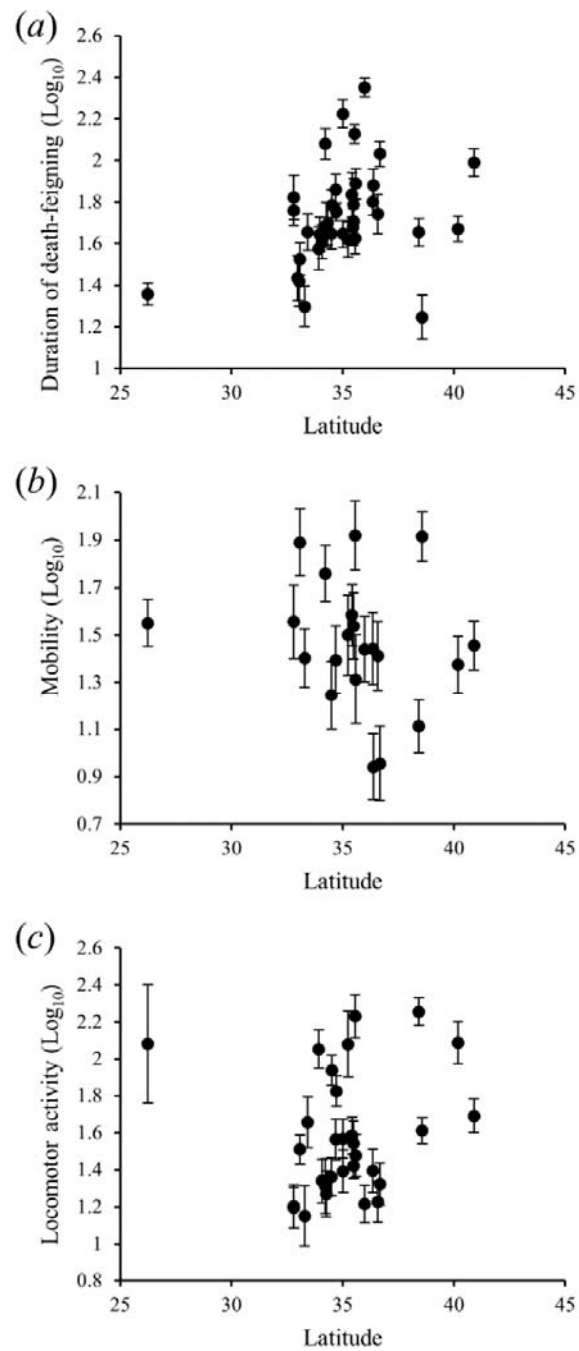

525

526 **Figure A1.** Relationship between latitude and each behavioural trait (a: death-feigning,

527 b: mobility, c: locomotor activity). Error bars show SE.

528

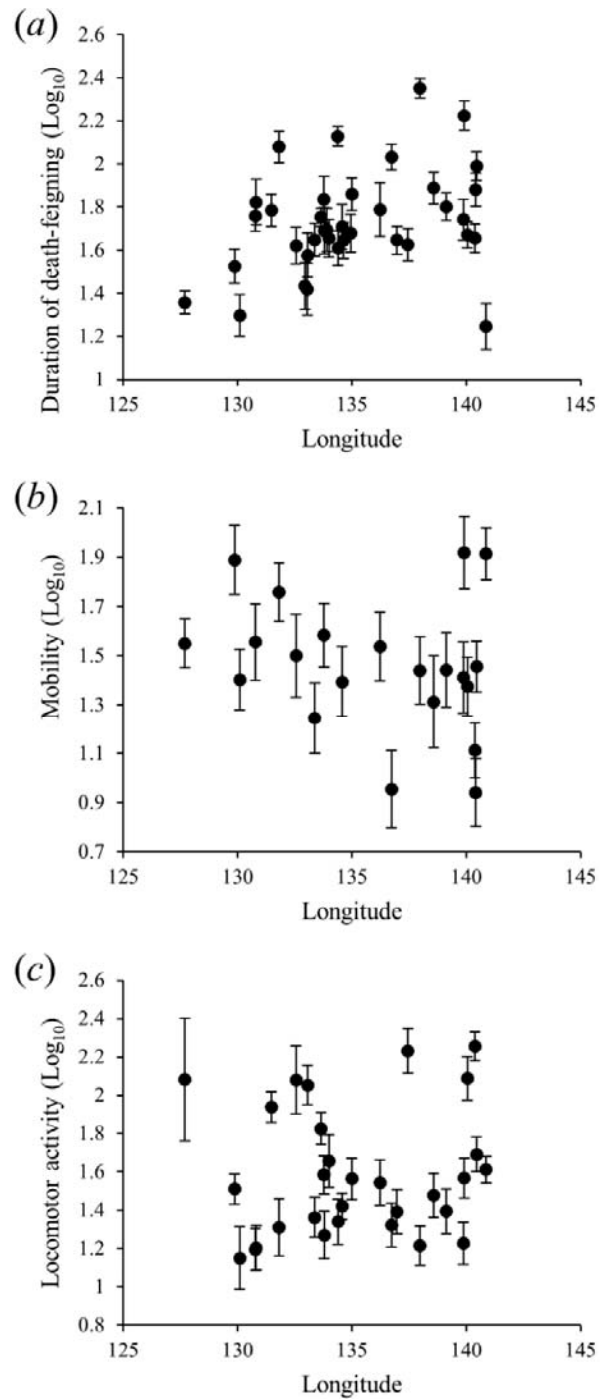

529

530 **Figure A2.** Relationship between longitude and each behavioural trait (a: death-feigning,

531 b: mobility, c: locomotor activity). Error bars show SE.
